# Supplementary material for: MICOS coordinates with respiratory complexes and lipids to establish mitochondrial inner membrane architecture
Source: eLife. 2015 Apr 28;4:e07739. doi: 10.7554/eLife.07739 (PMC4434539; doi:10.7554/eLife.07739)
Supplement: Figure 3—source data 1. — Data from table are presented graphically in Figures 3G, 4C. In some cases, multiple experiments were performed simultaneously with a single control experiment. DOI: http://dx.doi.org/10.7554/eLife.07739.008 [file elife07739s001.xlsx]

## Sheet: Sheet1
Figure 3 - source data 1
		Mic19	Mic60	Mic27	Mic10	Mic12	Mic26
	wild type Rho+ Mic27-EGFP (run 1)	269 (95%)	668 (75%)	121 (53%)	45 (32%)	81 (64%)	123 (60%)
	wild type Rho+ Mic27-EGFP (run 2)	145 (96%)	429 (76%)	68 (49%)	29 (42%)	55 (66%)	58 (59%)
	∆mic60 Rho+ Mic27-EGFP (run 1)	0 (0%)	0 (0%)	158 (53%)	24 (32%)	3 (20%)	0 (0%)
	∆mic60 Rho+ Mic27-EGFP (run 2)	0 (0%)	0 (0%)	76 (50%)	12 (22%)	9 (31%)	0 (0%)
	∆mic60 Rho0 Mic27-EGFP (run 1)	0 (0%)	0 (0%)	194 (60%)	0 (0%)	0 (0%)	0 (0%)
	∆mic60 Rho0 Mic27-EGFP (run 2)	0 (0%)	0 (0%)	120 (68%)	3 (21%)	2 (8%)	0 (0%)
							total spectra (% coverage)
