# Supplementary material for: MICOS coordinates with respiratory complexes and lipids to establish mitochondrial inner membrane architecture
Source: eLife. 2015 Apr 28;4:e07739. doi: 10.7554/eLife.07739 (PMC4434539; doi:10.7554/eLife.07739)
Supplement: Figure 4—source data 1. — Data from table (A) are presented graphically in Figures 3G, 4C, and this table is redisplayed from Figure 3—source data 1. Data from table (B) are not presented graphically. DOI: http://dx.doi.org/10.7554/eLife.07739.010 [file elife07739s002.xlsx]

## Sheet: Sheet1
Figure 4 - source data 1
A
		Mic19	Mic60	Mic27	Mic10	Mic12	Mic26
	wild type Rho+ Mic27-EGFP (run 1)	269 (95%)	668 (75%)	121 (53%)	45 (32%)	81 (64%)	123 (60%)
	wild type Rho+ Mic27-EGFP (run 2)	145 (96%)	429 (76%)	68 (49%)	29 (42%)	55 (66%)	58 (59%)
	∆mic60 Rho+ Mic27-EGFP (run 1)	0 (0%)	0 (0%)	158 (53%)	24 (32%)	3 (20%)	0 (0%)
	∆mic60 Rho+ Mic27-EGFP (run 2)	0 (0%)	0 (0%)	76 (50%)	12 (22%)	9 (31%)	0 (0%)
	∆mic60 Rho0 Mic27-EGFP (run 1)	0 (0%)	0 (0%)	194 (60%)	0 (0%)	0 (0%)	0 (0%)
	∆mic60 Rho0 Mic27-EGFP (run 2)	0 (0%)	0 (0%)	120 (68%)	3 (21%)	2 (8%)	0 (0%)
							total spectra (% coverage)
B
		Mic19	Mic60	Mic27	Mic10	Mic12	Mic26
	Mic60-FLAG Rho+ (run 1)	132 (91%)	574 (76%)	56 (32%)	8 (31%)	40 (64%)	57 (55%)
	Mic60-FLAG Rho+ (run 2)	22 (79%)	73 (59%)	13 (32%)	3 (16%)	1 (8%)	6 (23%)
	Mic60-FLAG Rho0 (run 1)	158 (91%)	1188 (80%)	50 (32%)	7 (31%)	44 (76%)	56 (55%)
	Mic60-FLAG Rho0 (run 2)	21 (49%)	100 (60%)	13 (32%)	5 (31%)	6 (42%)	9 (34%)
	Mic27-FLAG Rho+ (run 1)	35 (91%)	64 (58%)	23 (31%)	4 (27%)	9 (28%)	11 (30%)
	Mic27-FLAG Rho+ (run 2)	29 (76%)	58 (58%)	20 (27%)	4 (31%)	6 (42%)	7 (27%)
	Mic27-FLAG Rho0 (run 1)	24 (77%)	55 (53%)	16 (27%)	2 (16%)	7 (35%)	7 (33%)
	Mic27-FLAG Rho0 (run 2)	25 (77%)	57 (57%)	24 (31%)	4 (21%)	8 (45%)	5 (18%)
							total spectra (% coverage)
