# Supplementary material for: MICOS coordinates with respiratory complexes and lipids to establish mitochondrial inner membrane architecture
Source: eLife. 2015 Apr 28;4:e07739. doi: 10.7554/eLife.07739 (PMC4434539; doi:10.7554/eLife.07739)
Supplement: Figure 5—source data 1. — Data from table are presented graphically in Figure 5C. In some cases, multiple experiments were performed simultaneously with a single control experiment. DOI: http://dx.doi.org/10.7554/eLife.07739.017 [file elife07739s003.xlsx]

## Sheet: Sheet1
Figure 5 - source data 1
		Mic19	Mic60	Mic27	Mic10	Mic12	Mic26
	wild type Mic27-EGFP (run 1)	145 (96%)	429 (76%)	68 (49%)	29 (42%)	55 (66%)	58 (59%)
	wild type Mic27-EGFP (run 2)	35 (60%)	121 (61%)	28 (41%)	11 (32%)	19 (66%)	18 (55%)
	∆crd1 Mic27-EGFP (run 1)	116 (99%)	376 (76%)	87 (68%)	18 (32%)	45 (56%)	33 (62%)
	∆crd1 Mic27-EGFP (run 2)	34 (63%)	81 (58%)	41 (42%)	14 (32%)	13 (66%)	5 (23%)
	∆crd1∆mic60 Mic27-EGFP (run 1)	0 (0%)	0 (0%)	33 (45%)	0 (0%)	0 (0%)	0 (0%)
	∆crd1∆mic60 Mic27-EGFP (run 2)	0 (0%)	0 (0%)	22 (33%)	0 (0%)	0 (0%)	0 (0%)
							total spectra (% coverage)
