# Supplementary material for: MICOS coordinates with respiratory complexes and lipids to establish mitochondrial inner membrane architecture
Source: eLife. 2015 Apr 28;4:e07739. doi: 10.7554/eLife.07739 (PMC4434539; doi:10.7554/eLife.07739)
Supplement: Figure 7—source data 1. — Data are presented graphically in Figure 7A. DOI: http://dx.doi.org/10.7554/eLife.07739.021 [file elife07739s004.xlsx]

## Sheet: Sheet1
Figure 7 - source data 1
		Mic19	Mic60	Mic27	Mic10	Mic12	Mic26
	wild type Mic60-EGFP (run 1)	71 (96%)	507 (81%)	52 (50%)	20 (32%)	43 (66%)	63 (61%)
	wild type Mic60-EGFP (run 2)	69 (96%)	425 (80%)	47 (51%)	18 (32%)	34 (66%)	45 (59%)
	∆mic19 Mic60-EGFP (run 1)	0 (0%)	446 (81%)	1 (3%)	4 (21%)	2 (19%)	0 (0%)
	∆mic19 Mic60-EGFP (run 2)	0 (0%)	453 (80%)	0 (0%)	1 (11%)	2 (20%)	0 (0%)
	wild type Mic27-EGFP (run 1)	118 (96%)	380 (70%)	83 (47%)	31 (42%)	49 (66%)	77 (70%)
	wild type Mic27-EGFP (run 2)	134 (96%)	413 (74%)	97 (53%)	35 (42%)	52 (66%)	87 (61%)
	∆mic19 Mic27-EGFP (run 1)	0 (0%)	33 (23%)	51 (35%)	12 (31%)	3 (8%)	0 (0%)
	∆mic19 Mic27-EGFP (run 2)	0 (0%)	23 (18%)	43 (20%)	10 (31%)	3 (8%)	0 (0%)
							total spectra (% coverage)
